# Supplementary material for: Development of Radiomic-Based Model to Predict Clinical Outcomes in Non-Small Cell Lung Cancer Patients Treated with Immunotherapy
Source: MDPI journal article supplement (doi:10.3390/cancers14235931), 2022-11-30
Supplement: s1 [file s1]

**Table S1.** Acquisition reconstruction and pre processing parameters.

|                              |                                                                                                                                                                                                                                                                                                                                                                                                                                                                                   |
|------------------------------|-----------------------------------------------------------------------------------------------------------------------------------------------------------------------------------------------------------------------------------------------------------------------------------------------------------------------------------------------------------------------------------------------------------------------------------------------------------------------------------|
| <b>Acquisition parameter</b> | Scans performed $60 \pm 5$ minutes after intravenous administration of 2.25 to 3 MBq/kg of $^{18}\text{F}$ -FDG.                                                                                                                                                                                                                                                                                                                                                                  |
|                              | Scanner : Biograph mCT40 ToF (Siemens Healthcare, Erlangen, Germany).<br>Standard routine protocol based on EANM guidelines : fasting for at least 6 hours, glucose level $<2$ g/L.<br>Low-dose CT acquired for attenuation correction and anatomical correlation of PET abnormalities: tube current 120 kV, CARE Dose 4D current modulation system, reconstruction using 5 mm slice thickness.<br>PET acquisitions : 3.5 minutes per bed position from mid thighs to skull base. |
| <b>Reconstruction</b>        | OSEM-TrueX-TOF algorithm<br>3 iterations, 21 subsets<br>Voxel size : $4.073 \times 4.073 \times 2.072$ mm <sup>3</sup>                                                                                                                                                                                                                                                                                                                                                            |
| <b>Pre processing</b>        | Voxel size was first resampled to isotropic resolutions of 1 mm, 1.5 mm and 2 mm using cubic B-spline interpolation.<br>Various quantization methods were applied : fixed-bin width (0.25 and 0.5), fixed-bin number (32 and 64) of gray levels.<br>Filtering: Laplacian of Gaussian filters using four thresholds (0.5 mm, 1 mm, 2 mm, and 3 mm)<br>In addition, 8 different image series were also derived using Haar wavelet filters.                                          |

**Table S2.** List of Radiomics Parameters.

| Parameter class             | parameters                            |
|-----------------------------|---------------------------------------|
| <b>First Order Features</b> | Energy                                |
|                             | Total Energy                          |
|                             | Minimum                               |
|                             | 10th percentile                       |
|                             | 10th percentile                       |
|                             | Maximum                               |
|                             | Mean                                  |
|                             | Median                                |
|                             | Interquartile Range                   |
|                             | Range                                 |
|                             | Mean Absolute Deviation (MAD)         |
|                             | Robust Mean Absolute Deviation (rMAD) |
|                             | Root Mean Squared (RMS)               |
|                             | Standard Deviation                    |
| <b>Shape Features (3D)</b>  | Skewness                              |
|                             | Kurtosis                              |
|                             | Variance                              |
|                             | Uniformity                            |
|                             | Mesh                                  |
|                             | Surface                               |
|                             | Surface Area to Volume ratio          |
|                             | Sphericity                            |
|                             | Compactness                           |
|                             | Spherical Disproportion               |
| <b>Shape Features (2D)</b>  | Maximum 3D diameter                   |
|                             | Maximum 2D diameter (Slice)           |
|                             | Maximum 2D diameter (Column)          |
|                             | Maximum 2D diameter (Row)             |
|                             | Major Axis Length                     |
|                             | Minor Axis Length                     |
|                             | Least Axis Length                     |
|                             | Elongation                            |
|                             | Flatness                              |
|                             | Mesh Surface                          |

|                                                                                      |                                                             |
|--------------------------------------------------------------------------------------|-------------------------------------------------------------|
| <b>Gray Level Co-occurrence Matrix (GLCM) Features</b><br><b>Local heterogeneity</b> | Pixel Surface                                               |
|                                                                                      | Perimeter                                                   |
|                                                                                      | Perimeter to Surface ratio                                  |
|                                                                                      | Sphericity                                                  |
|                                                                                      | Spherical Disproportion                                     |
|                                                                                      | Maximum 2D diameter                                         |
|                                                                                      | Major Axis Length                                           |
|                                                                                      | Minor Axis Length                                           |
|                                                                                      | Elongation                                                  |
|                                                                                      | Autocorrelation                                             |
|                                                                                      | Joint Average                                               |
|                                                                                      | Cluster Prominence                                          |
|                                                                                      | Cluster Shade                                               |
|                                                                                      | Cluster Tendency                                            |
|                                                                                      | Contrast                                                    |
|                                                                                      | Correlation                                                 |
|                                                                                      | Difference Average                                          |
|                                                                                      | Difference Entropy                                          |
|                                                                                      | Difference Variance                                         |
|                                                                                      | Joint Energy                                                |
|                                                                                      | Joint Entropy                                               |
|                                                                                      | Informational Measure of Correlation (IMC) 1                |
|                                                                                      | Informational Measure of Correlation (IMC)                  |
|                                                                                      | Inverse Difference Moment (IDM)                             |
|                                                                                      | Maximal Correlation Coefficient (MCC) .                     |
|                                                                                      | Inverse Difference Moment Normalized (IDMN)                 |
|                                                                                      | Inverse Difference (ID) Inverse Difference Normalized (IDN) |
|                                                                                      | Inverse Variance                                            |
|                                                                                      | Maximum                                                     |
|                                                                                      | Sum Average                                                 |
|                                                                                      | Sum Entropy                                                 |
|                                                                                      | Sum of Squares                                              |
| <b>Gray Level Size Zone Matrix (GLSZM) Features</b>                                  | Small Area Emphasis (SAE)                                   |
|                                                                                      | Large Area Emphasis (LAE)                                   |
|                                                                                      | Gray Level Non-Uniformity (GLN)                             |
|                                                                                      | Gray Level Non-Uniformity Normalized (GLNN)                 |
|                                                                                      | Size-Zone Non-Uniformity (SZN)                              |
|                                                                                      | Size-Zone Non-Uniformity Normalized (SZNN)                  |
|                                                                                      | Zone Percentage (ZP)                                        |
|                                                                                      | Gray Level Variance (GLV)                                   |
|                                                                                      | Zone Variance (ZV)                                          |
|                                                                                      | 10. Zone Entropy (ZE)                                       |
|                                                                                      | Low Gray Level Zone Emphasis (LGLZE)                        |
|                                                                                      | High Gray Level Zone Emphasis (HGLZE)                       |
|                                                                                      | Small Area Low Gray Level Emphasis (SALGLE)                 |
|                                                                                      | Small Area High Gray Level Emphasis (SAHGLE)                |
|                                                                                      | Large Area Low Gray Level Emphasis (LALGLE)                 |
|                                                                                      | Large Area High Gray Level Emphasis (LAHGLE)                |
| <b>Gray Level Run Length Matrix (GLRLM) Features</b><br>(regional heterogeneity)     | Short Run Emphasis (SRE)                                    |
|                                                                                      | Long Run Emphasis (LRE)                                     |
|                                                                                      | Gray Level Non-Uniformity (GLN)                             |
|                                                                                      | Gray Level Non-Uniformity Normalized (GLNN)                 |
|                                                                                      | Run Length Non-Uniformity (RLN)                             |
|                                                                                      | Run Length Non-Uniformity Normalized (RLNN)                 |
|                                                                                      | Run Percentage (RP)                                         |
|                                                                                      | Gray Level Variance (GLV)                                   |
|                                                                                      | Run Variance (RV)                                           |
|                                                                                      | Run Entropy (RE) .                                          |
|                                                                                      | Low Gray Level Run Emphasis (LGLRE)                         |
|                                                                                      | High Gray Level Run Emphasis (HGLRE)                        |
|                                                                                      | Short Run Low Gray Level Emphasis (SRLGLE)                  |
|                                                                                      | Short Run High Gray Level Emphasis (SRHGLE)                 |
|                                                                                      | Long Run Low Gray Level Emphasis (LRLGLE)                   |
|                                                                                      | Long Run High Gray Level Emphasis (LRHGLE)                  |

**Neighbouring Gray Tone Difference Matrix  
(NGTDM) Features**

Coarseness  
Contrast  
Busyness  
Complexity  
Strength :

Small Dependence Emphasis (SDE)  
Large Dependence Emphasis (LDE)  
Gray Level Non-Uniformity (GLN)  
Dependence Non-Uniformity (DN)  
Dependence Non-Uniformity Normalized (DNUN)

**Gray Level Dependence Matrix (GLDM) Features**

Gray Level Variance (GLV) Measures the variance in grey level in the image.  
Dependence Variance (DV) Measures the variance in dependence size in the image.  
Dependence Entropy (DE)  
Low Gray Level Emphasis (LGLE)  
High Gray Level Emphasis (HGLE)  
Small Dependence Low Gray Level Emphasis (SDLGLE)  
Small Dependence High Gray Level Emphasis (SDHGLE)  
Large Dependence Low Gray Level Emphasis (LDLGLE)  
Large Dependence High Gray Level Emphasis (LDHGLE)

**Table S3.** Results of descriptive analysis for OS, PFS and DCB.

| Variable         | OS (p value)   | PFS (p value) | DCB (p value)  |
|------------------|----------------|---------------|----------------|
| Age              | 0.26           | 0.12          | 0.53           |
| PS (0 vs ≥ 1)    | <b>0.003</b>   | <b>0.0005</b> | <b>0.00009</b> |
| Tabacco history  | 0.29           | 0.98          | 0.48           |
| Histology        | 0.72           | 0.72          | 0.58           |
| PD-L1 ≥ 50%      | <b>0.00003</b> | 0.8           | 0.88           |
| Stage            | 0.5            | 0.17          | <b>0.03</b>    |
| Brain metastasis | 0.2            | 0.83          | 0.7            |

PS : Eastern Cooperative Oncology Group performance status. OS: overall survival; PFS: progression free survival.

**Table S4.** Results of univariate analysis with bootstrap for durable clinical benefit (DCB) (mean AUC, its standard deviation and confidence intervals).

| Feature type  | Best feature       | DCB                          |
|---------------|--------------------|------------------------------|
| Clinical      | Age                | 0.58 0.11 [0.42-0.75]        |
| Clinical      | PS                 | 0.70 ± 0.11 [0.429 - 0.818]  |
| PET0 Radiomic | DNUN               | 0.774 ± 0.09 [0.640 - 0.912] |
| PET1 Radiomic | IMC2               | 0.872 ± 0.05 [0.8 – 0.945]   |
| Delta-PET     | Total Energy       | 0.807 ± 0.10 [0.638 – 0.959] |
| CT0 Radiomic  | SALGLE             | 0.751 ± 0.10 [0.582 - 0.861] |
| CT1 Radiomic  | Busyness           | 0.897 ± 0.09 [0.730 – 0.993] |
| Delta-CT      | Difference Average | 0.895 ± 0.06 [0.795 - 1]     |

PS : Eastern Cooperative Oncology Group performance status; DNUN : Dependence Non-Uniformity Normalized; IMC: Informational Measure of Correlation; SALGLE: Small Area Low Gray Level Emphasis.

## A Age

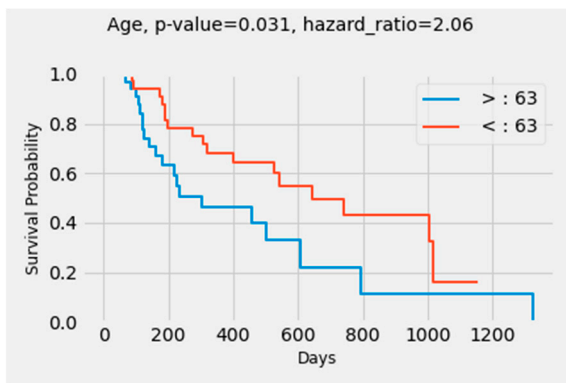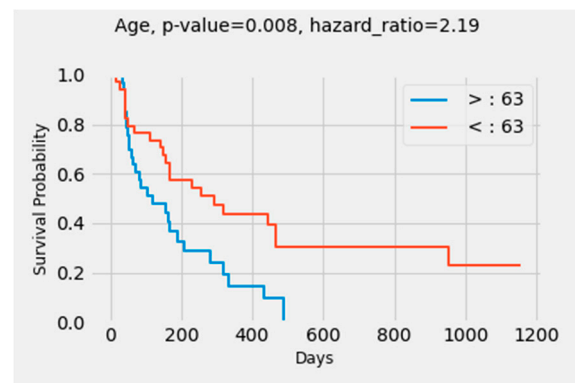

## B : Performance status

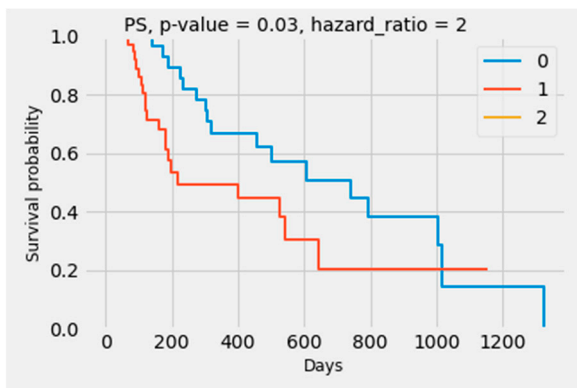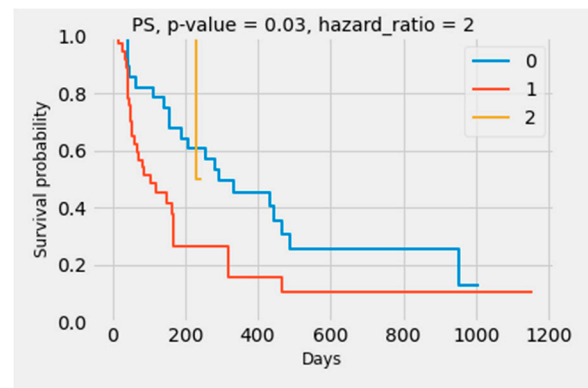

## C Histology

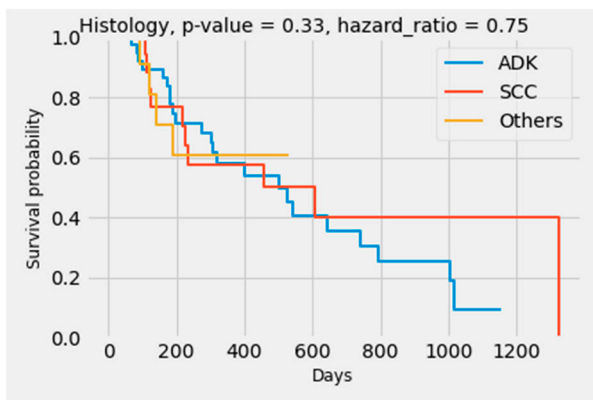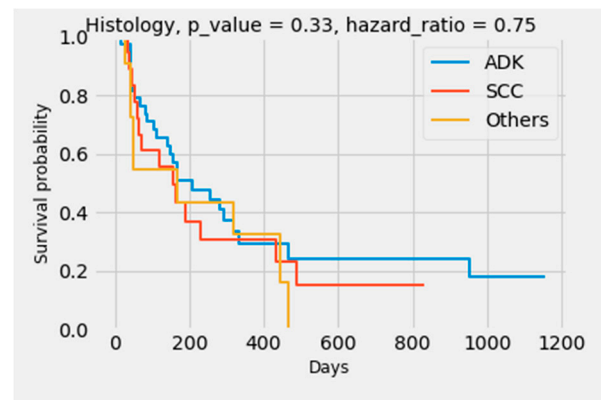

## D Smoking history

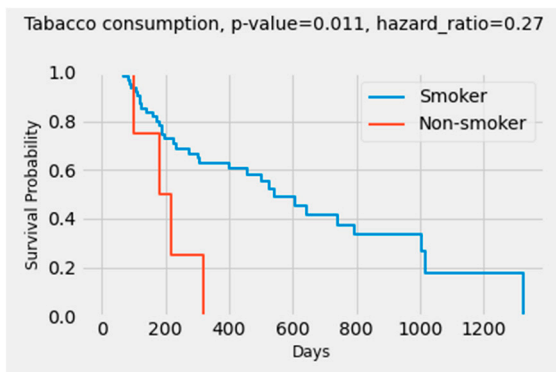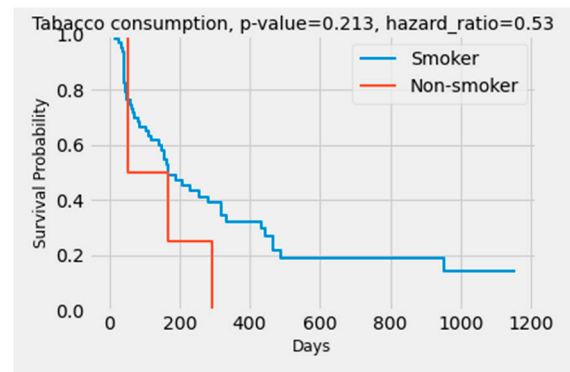

## E : Metabolic Tumor volume

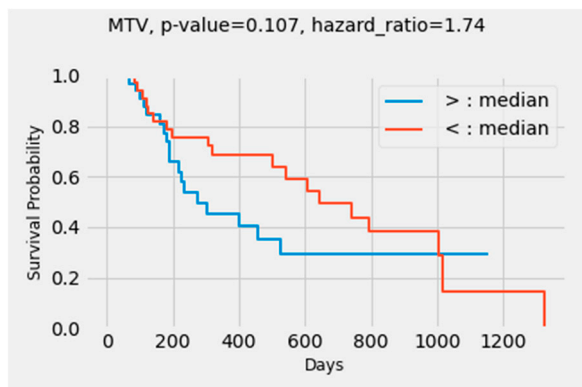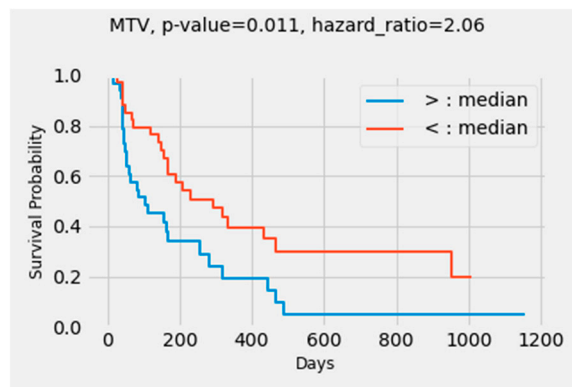

## F Total lesion glycolysis

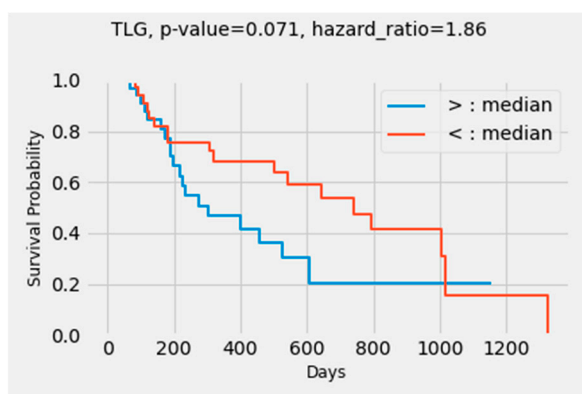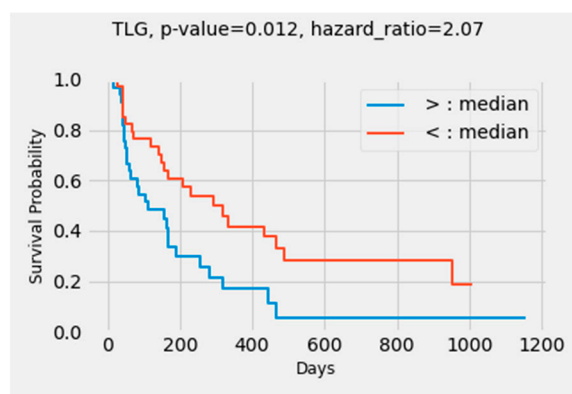

**Figure S1.** Overall Survival (left) and Progression Free Survival (right) related to clinical and baseline metabolic PET metrics (Kaplan Meier and log rank test).

A – Baseline

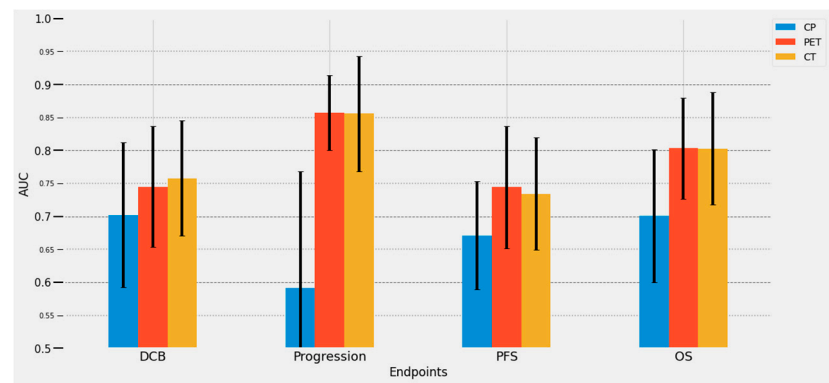

B – 2 months after treatment initiation (PET/CT1)

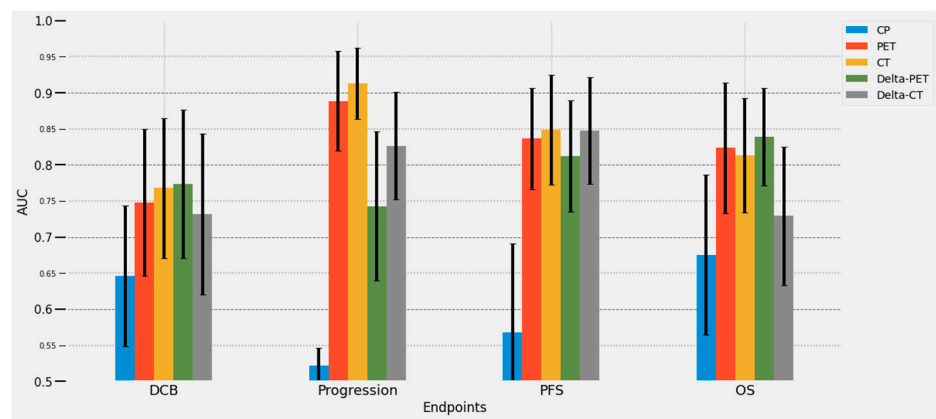

C – 3 months after treatment initiation (PET/CT2)

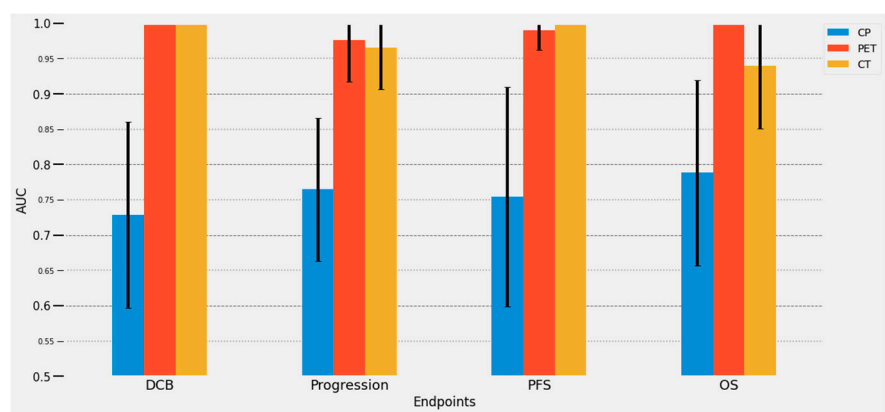

**Figure S2: Prediction of outcome: Best clinical PET and CT parameters performance at baseline and during treatment: best AUC value obtained for the considered parameters using univariate analysis with bootstrap. *DCB: Durable clinical benefit. OS: overall survival; PFS: progression free survival. OS: overall survival.***

**Table S5.** Kaplan Meier and Cox analysis scores for clinical parameters : (A) Progression-Free Survival, (B) Overall survival.

| <i>A</i>                       |              |           |             |
|--------------------------------|--------------|-----------|-------------|
| Parameter                      | Hazard Ratio | CI (95%)  | p           |
| Sex                            | 1.36         | 0.7-2.64  | 0.36        |
| Brain metastasis               | 0.78         | 0.4-1.5   | 0.45        |
| PS (0 vs 1-2)                  | 1.96         | 1.09-3.53 | <b>0.03</b> |
| Tabacco history                | 0.53         | 0.19-1.49 | 0.22        |
| Stage                          | 0.6          | 0.25-1.42 | 0.24        |
| Histology ADK vs SCC+others    | 0.75         | 0.43-1.33 | 0.33        |
| Age (cut off : median)         | 2.19         | 1.21-3.96 | <b>0.01</b> |
| <i>B</i>                       |              |           |             |
| Parameter                      | Hazard ratio | CI (95%)  | p           |
| Sex                            | 1.01         | 0.49-2.1  | 0.97        |
| Metastasis                     | 0.8          | 0.37-1.7  | 0.56        |
| PS (0 vs 1-2)                  | 1.73         | 0.89-3.39 | 0.11        |
| Tabacco                        | 0.27         | 0.09-0.79 | <b>0.02</b> |
| Stage                          | 0.5          | 0.18-1.43 | 0.2         |
| Histology ADK vs<br>SCC+others | 1.19         | 0.6-2.36  | 0.62        |
| Age                            | 2.06         | 1.05-4.01 | <b>0.03</b> |

*PS : ECOG performance status; ADK : adenocarcinoma; SCC : squamous cell cancer*

**Table S6: Progression-Free Survival Kaplan Meier and Cox analysis scores for PET radiomics.**

| <b>Radiomic parameter</b>                       | <b>Hazard Ratio</b> | <b>CI (95%)</b> | <b>p</b> |
|-------------------------------------------------|---------------------|-----------------|----------|
| 0.5_wavelet-                                    |                     |                 |          |
| HLL_gldm_LargeDependenceHighGrayLevelEmphasis   | 2.73                | 1.51-4.93       | 0.001    |
| 64_wavelet-HLH_gldm_ClusterShade                | 0.36                | 0.19-0.37       | 0.001    |
| 64_wavelet-HHL_gldm_LongRunLowGrayLevelEmphasis | 0.37                | 0.2-0.68        | 0.001    |
| 64_wavelet-LLH_firstorder_Skewness              | 0.38                | 0.21-0.7        | 0.002    |
| 64_wavelet-LLH_gldm_ClusterShade                | 0.39                | 0.22-0.71       | 0.002    |
| 64_log-sigma-3-0-mm-3D_firstorder_Kurtosis      | 2.44                | 1.37-4.36       | 0.003    |
| 0.5_wavelet-LLH_gldm_Imc1                       | 2.33                | 1.3-4.19        | 0.005    |
| 64_wavelet-HHL_firstorder_Kurtosis              | 2.3                 | 1.29-4.1        | 0.005    |
| 64_wavelet-LHH_gldm_ClusterProminence           | 0.43                | 0.24-0.78       | 0.005    |
| 64_original_gldm_SumSquares                     | 0.44                | 0.25-0.79       | 0.006    |
| 64_log-sigma-0-5-mm-3D_gldm_ClusterProminence   | 0.44                | 0.25-0.79       | 0.006    |
| 64_wavelet-HLL_firstorder_Kurtosis              | 2.24                | 1.26-4          | 0.006    |
| Total lesion Glycolysis                         | 2.07                | 1.16-3.68       | 0.014    |
| Metabolic tumor volume                          | 2.06                | 1.16-3.64       | 0.013    |

Abbreviations : cf list of radiomics parameters.



**Table S7: Overall Survival Kaplan Meier and Cox analysis scores for PET radiomics.**

| <b>Radiomic parameter</b>                                     | <b>Hazard Ratio</b> | <b>CI (95%)</b> | <b>p</b> |
|---------------------------------------------------------------|---------------------|-----------------|----------|
| <b>0.5_wavelet-HLL_glcml_ClusterShade</b>                     | 0.28                | 0.13-0.61       | 0.002    |
| <b>64_wavelet-HLH_glcml_ClusterShade</b>                      | 0.3                 | 0.14-0.65       | 0.002    |
| <b>64_wavelet-HLH_firstorder_Mean</b>                         | 0.33                | 0.16-0.66       | 0.002    |
| <b>_64_wavelet-HHL_glrml_LongRunLowGrayLevelEmphasis</b>      | 0.32                | 0.15-0.38       | 0.003    |
| <b>0.5_wavelet-HHH_glszm_GrayLevelNonUniformityNormalized</b> | 3.11                | 1.44-6.69       | 0.004    |
| <b>64_wavelet-LHH_glcml_ClusterProminence</b>                 | 0.33                | 0.15-0.71       | 0.004    |
| <b>64_wavelet-HLL_firstorder_Kurtosis</b>                     | 2.8                 | 1.38-5.7        | 0.004    |
| <b>Total lesion Glycolysis</b>                                | 1.86                | 0.94-3.7        | 0.074    |
| <b>Metabolic tumor volume</b>                                 | 1.74                | 0.88-3.45       | 0.11     |

Abbreviations : cf list of radiomics parameters.

**Table S8: Progression-Free Survival Kaplan Meier and Cox analysis scores for CT radiomics.**

| <b>Radiomic</b>                                                        | <b>Hazard Ratio</b> | <b>CI I(95%)</b> | <b>p</b> |
|------------------------------------------------------------------------|---------------------|------------------|----------|
| Interpolated1_32_wavelet-<br>HLH_glszm_SizeZoneNonUniformityNormalized | 0.28                | 0.15-0.51        | 3E-05    |
| Original_64_wavelet-<br>LLL_glszm_GrayLevelNonUniformityNormalized     | 3.02                | 1.66-5.5         | 3E-05    |
| Original_64_original_glcml_ClusterProminence                           | 0.36                | 0.2-0.66         | 0.0009   |
| Interpolated1_32_wavelet-<br>HHL_glszm_SizeZoneNonUniformityNormalized | 0.4                 | 0.23-0.72        | 0.002    |
| Original_32_wavelet-HLH_glcml_InverseVariance                          | 2.46                | 1.38-4.4         | 0.002    |
| Original_64_original_glcml_Imc1                                        | 2.45                | 1.36-4.43        | 0.003    |
| Original_32_log-sigma-3-0-mm-<br>3D_glszm_GrayLevelVariance            | 0.41                | 0.23-0.74        | 0.003    |
| Original_64_log-sigma-1-0-mm-<br>3D_glrml_LongRunLowGrayLevelEmphasis  | 0.4                 | 0.22-0.74        | 0.003    |
| Original_32_log-sigma-2-0-mm-<br>3D_glszm_LowGrayLevelZoneEmphasis     | 0.42                | 0.23             | 0.004    |
| Original_32_wavelet-LLL_glcml_InverseVariance                          | 2.38                | 1.32             | 0.004    |
| Original_64_log-sigma-3-0-mm-3D_glcml_Imc2                             | 0.42                | 0.23             | 0.04     |
| 64_wavelet-LLH_firstorder_Skewness                                     | 0.43                | 0.24             | 0.005    |
| Interpolated1_32_wavelet-<br>LLH_glszm_SizeZoneNonUniformityNormalized | 0.43                | 0.24             | 0.005    |
| Original_64_log-sigma-2-0-mm-3D_firstorder_Skewness                    | 0.43                | 0.24             | 0.005    |
| Interpolated1_64_wavelet-HHH_firstorder_Median                         | 2.29                | 1.27             | 0.006    |
| Original_32_wavelet-LLL_glrml_RunEntropy                               | 0.44                | 0.24             | 0.006    |
| Original_64_log-sigma-2-0-mm-3D_glcml_ClusterShade                     | 0.45                | 0.25             | 0.006    |

Abbreviations : cf list of radiomics parameters.

**Table S9: Overall Survival Kaplan Meier and Cox analysis scores for CT radiomics.**

| <b>Radiomic</b>                                                    | <b>Hazard Ratio</b> | <b>CI (95%)</b> | <b>P</b> |
|--------------------------------------------------------------------|---------------------|-----------------|----------|
| HLH_glszm_SizeZoneNonUniformityNormalizedInterpolated1_32_wavelet  | 0.34                | 0.16-.68        | 0.003    |
| 32_wavelet-HLH_glcml_InverseVariance                               | 2.71                | 1.36-5.38       | 0.005    |
| Interpolated1_32_wavelet-LLH_glszm_SizeZoneNonUniformityNormalized | 0.37                | 0.18-0.75       | 0.006    |
| Original_64_wavelet-HHL_glszm_LargeAreaEmphasis                    | 2.79                | 1.33-5.86       | 0.007    |

Abbreviations : cf list of radiomics parameters.

**Table S10: Radiomics Quality Score**

| Item                                                                                                                                                                                                                                                      | Points                                                                                                                                                               | Current Study |
|-----------------------------------------------------------------------------------------------------------------------------------------------------------------------------------------------------------------------------------------------------------|----------------------------------------------------------------------------------------------------------------------------------------------------------------------|---------------|
| Image protocol quality - well-documented image protocols (for example. contrast. slice thickness. energy. etc.) and/or usage of public image protocols allow reproducibility/replicability                                                                | <input checked="" type="checkbox"/> protocols well documented (+1)<br><input checked="" type="checkbox"/> public protocol used (+1)<br><input type="checkbox"/> none | 2             |
| Multiple segmentations - possible actions are: segmentation by different physicians/algorithms/software. perturbing segmentations by (random) noise. segmentation at different breathing cycles. Analyse feature robustness to segmentation variabilities | <input type="checkbox"/> yes (+1)<br><input type="checkbox"/> no                                                                                                     | 0             |
| Phantom study on all scanners - detect inter-scanner differences and vendor-dependent features. Analyse feature robustness to these sources of variability                                                                                                | <input type="checkbox"/> yes (+1)<br><input type="checkbox"/> no                                                                                                     | 0             |
| Imaging at multiple time points - collect images of individuals at additional time points. Analyse feature robustness to temporal variabilities (for example. organ movement. organ expansion/shrinkage)                                                  | <input type="checkbox"/> yes (+1)<br><input type="checkbox"/> no                                                                                                     | 0             |
| Feature reduction or adjustment for multiple testing - decreases the risk of overfitting. Overfitting is inevitable if the number of features exceeds the number of samples. Consider feature robustness when selecting features                          | <input type="checkbox"/> Either measure implemented (+3)<br><input type="checkbox"/> Neither measure implemented (-3)                                                | 3             |
| Multivariable analysis with non radiomics features (for example. EGFR mutation) - is expected to provide a more holistic model. Permits correlating/inferencing between radiomics and non radiomics features                                              | <input type="checkbox"/> yes(+1)<br><input type="checkbox"/> no                                                                                                      | 1             |
| Detect and discuss biological correlates - demonstration of phenotypic differences (possibly associated with underlying gene–protein expression patterns) deepens understanding of radiomics and biology                                                  | <input type="checkbox"/> yes (+1)<br><input type="checkbox"/> no                                                                                                     | 0             |

|                                                                                                                                                                                                                                                                                               |                                                                                                                                                                                                                                                                                                                                                                                                                                                                                                                                           |   |
|-----------------------------------------------------------------------------------------------------------------------------------------------------------------------------------------------------------------------------------------------------------------------------------------------|-------------------------------------------------------------------------------------------------------------------------------------------------------------------------------------------------------------------------------------------------------------------------------------------------------------------------------------------------------------------------------------------------------------------------------------------------------------------------------------------------------------------------------------------|---|
| Cut-off analyses - determine risk groups by either the median. a previously published cut-off or report a continuous risk variable. Reduces the risk of reporting overly optimistic results                                                                                                   | <input checked="" type="radio"/> yes (+1)<br><br><input type="radio"/> no                                                                                                                                                                                                                                                                                                                                                                                                                                                                 | 1 |
| Discrimination statistics - report discrimination statistics (for example. C-statistic. ROC curve. AUC) and their statistical significance (for example. p-values. confidence intervals). One can also apply resampling method (for example. bootstrapping. cross-validation)                 | <input checked="" type="checkbox"/> a discrimination statistic and its statistical significance are reported (+1)<br><input checked="" type="checkbox"/> a resampling method technique is also applied<br><input type="checkbox"/> none                                                                                                                                                                                                                                                                                                   | 2 |
| Calibration statistics - report calibration statistics (for example. Calibration-in-the-large/slope. calibration plots) and their statistical significance (for example. P-values. confidence intervals). One can also apply resampling method (for example. bootstrapping. cross-validation) | <input checked="" type="checkbox"/> a calibration statistic and its statistical significance are reported (+1)<br><input checked="" type="checkbox"/> a resampling method technique is applied<br><input type="checkbox"/> none                                                                                                                                                                                                                                                                                                           | 2 |
| Prospective study registered in a trial database - provides the highest level of evidence supporting the clinical validity and usefulness of the radiomics biomarker                                                                                                                          | <input type="radio"/> yes (+7)<br><br><input checked="" type="radio"/> no                                                                                                                                                                                                                                                                                                                                                                                                                                                                 | 0 |
| Validation - the validation is performed without retraining and without adaptation of the cut-off value. provides crucial information with regard to credible clinical performance                                                                                                            | <input type="checkbox"/> No validation (-5)<br><input checked="" type="checkbox"/> validation is based on a dataset from the same institute (+2)<br><input type="checkbox"/> validation is based on a dataset from another institute (+3)<br><input type="checkbox"/> validation is based on two datasets from two distinct institutes (+4)<br><input type="checkbox"/> the study validates a previously published signature (+4)<br><input type="checkbox"/> validation is based on three or more datasets from distinct institutes (+5) | 2 |

|                                                                                                                                                                                                                                           |                                                                                                                                                                                                                                                                                                                                                                        |           |
|-------------------------------------------------------------------------------------------------------------------------------------------------------------------------------------------------------------------------------------------|------------------------------------------------------------------------------------------------------------------------------------------------------------------------------------------------------------------------------------------------------------------------------------------------------------------------------------------------------------------------|-----------|
| Comparison to 'gold standard' - assess the extent to which the model agrees with/is superior to the current 'gold standard' method (for example. TNM-staging for survival prediction). This comparison shows the added value of radiomics | <input checked="" type="radio"/> yes (+2)<br><input type="radio"/> no                                                                                                                                                                                                                                                                                                  | 2         |
| Potential clinical utility - report on the current and potential application of the model in a clinical setting (for example. decision curve analysis).                                                                                   | <input checked="" type="radio"/> yes (+2)<br><input type="radio"/> no                                                                                                                                                                                                                                                                                                  | 2         |
| Cost-effectiveness analysis - report on the cost-effectiveness of the clinical application (for example. QALYs generated)                                                                                                                 | <input checked="" type="radio"/> yes (+2)<br><input type="radio"/> no                                                                                                                                                                                                                                                                                                  | 2         |
| Open science and data - make code and data publicly available. Open science facilitates knowledge transfer and reproducibility of the study                                                                                               | <input type="checkbox"/> scans are open source (+1)<br><input type="checkbox"/> region of interest segmentations are open source (+1)<br><input type="checkbox"/> the code is open sourced (+1)<br><input type="checkbox"/> Radiomics features are calculated on a set of representative ROIs and the calculated features and representative ROIs are open source (+1) | 0         |
| <b>Total</b>                                                                                                                                                                                                                              | <b>36</b>                                                                                                                                                                                                                                                                                                                                                              | <b>19</b> |
